# Supplementary material for: Dihydrostreptomycin Directly Binds to, Modulates, and Passes through the MscL Channel Pore
Source: PubMed Central journal article supplement (PMC4900634; doi:10.1371/journal.pbio.1002473), 2016-06-09

**A**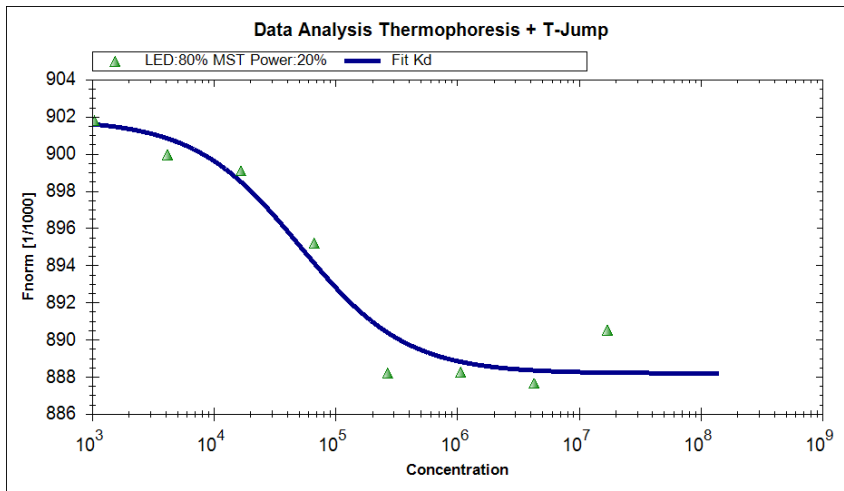**B**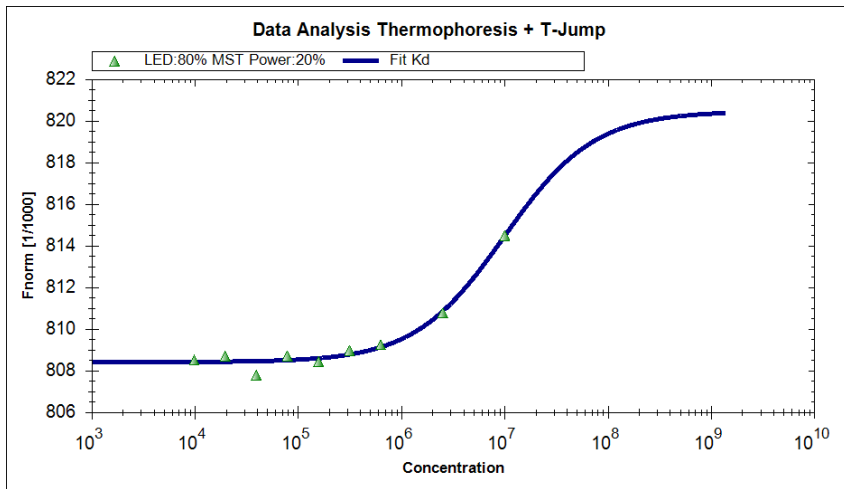**C**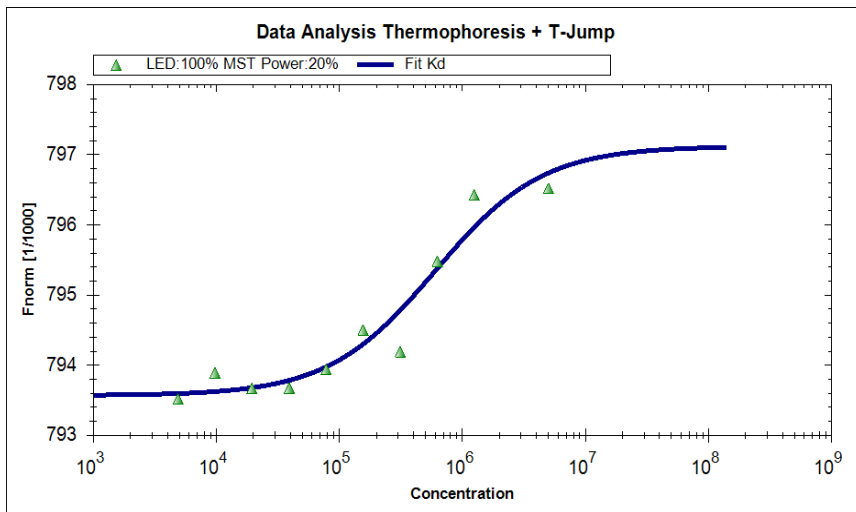

Supplement: pbio.1002473.s004.pdf [file pbio.1002473.s004.pdf]
